# Supplementary material
Source: publisher figshare collection journal article supplement (https://tandf.figshare.com/ndownloader/files/22397859)
Supplement: Supplementary file 1 [file 22397859]

## Supplementary Material

**Supplementary Table 1.** Patients receiving restricted immunosuppressive medication added after baseline over 52 weeks in the Japanese population (Treated Set).

| <b>Immunosuppressive agent (<i>n</i> [%])</b> | <b>Nintedanib<br/>(<i>N</i> = 34)</b> | <b>Placebo<br/>(<i>N</i> = 36)</b> |
|-----------------------------------------------|---------------------------------------|------------------------------------|
| Mycophenolate                                 | 1 (2.9)                               | 0 (0.0)                            |
| Methotrexate                                  | 0 (0.0)                               | 0 (0.0)                            |
| Rescue treatment                              |                                       |                                    |
| Cyclophosphamide                              | 3 (8.8)                               | 0 (0.0)                            |
| Azathioprine                                  | 0 (0.0)                               | 1 (2.8)                            |
| Tacrolimus                                    | 2 (5.9)                               | 2 (5.6)                            |

**Supplementary Table 2.** Patients with serious adverse events reported in the Japanese population (Treated Set).

| <b>Serious adverse event (<i>n</i> [%])</b>                 | <b>Nintedanib<br/>(<i>N</i> = 34)</b> | <b>Placebo<br/>(<i>N</i> = 36)</b> |
|-------------------------------------------------------------|---------------------------------------|------------------------------------|
| <b>Patients with at least one serious adverse event</b>     | <b>9 (26.5)</b>                       | <b>5 (13.9)</b>                    |
| <b>Respiratory, thoracic and mediastinal disorders</b>      | <b>4 (11.8)</b>                       | <b>1 (2.8)</b>                     |
| Interstitial lung disease                                   | 2 (5.9)                               | 0 (0.0)                            |
| Acute lung injury                                           | 1 (2.9)                               | 0 (0.0)                            |
| Pneumonia aspiration                                        | 1 (2.9)                               | 0 (0.0)                            |
| Pulmonary hypertension                                      | 1 (2.9)                               | 0 (0.0)                            |
| Dyspnoea                                                    | 0 (0.0)                               | 1 (2.8)                            |
| <b>Hepatobiliary disorders</b>                              | <b>3 (8.8)</b>                        | <b>1 (2.8)</b>                     |
| Bile duct stone                                             | 1 (2.9)                               | 0 (0.0)                            |
| Drug-induced liver injury                                   | 1 (2.9)                               | 1 (2.8)                            |
| Liver disorder                                              | 1 (2.9)                               | 0 (0.0)                            |
| <b>Infections and infestations</b>                          | <b>3 (8.8)</b>                        | <b>1 (2.8)</b>                     |
| Influenza                                                   | 1 (2.9)                               | 0 (0.0)                            |
| Lower respiratory tract infection                           | 1 (2.9)                               | 0 (0.0)                            |
| Pneumonia                                                   | 1 (2.9)                               | 0 (0.0)                            |
| Pyelonephritis                                              | 1 (2.9)                               | 0 (0.0)                            |
| Cellulitis                                                  | 0 (0.0)                               | 1 (2.8)                            |
| <b>Cardiac disorders</b>                                    | <b>1 (2.9)</b>                        | <b>1 (2.8)</b>                     |
| Atrial fibrillation                                         | 1 (2.9)                               | 0 (0.0)                            |
| Atrial flutter                                              | 0 (0.0)                               | 1 (2.8)                            |
| <b>Eye disorders</b>                                        | <b>1 (2.9)</b>                        | <b>1 (2.8)</b>                     |
| Glaucoma                                                    | 1 (2.9)                               | 0 (0.0)                            |
| Rhegmatogenous retinal detachment                           | 0 (0.0)                               | 1 (2.8)                            |
| <b>Gastrointestinal disorders</b>                           | <b>1 (2.9)</b>                        | <b>0 (0.0)</b>                     |
| Intestinal pseudo-obstruction                               | 1 (2.9)                               | 0 (0.0)                            |
| <b>General disorders and administration site conditions</b> | <b>1 (2.9)</b>                        | <b>0 (0.0)</b>                     |
| Multiple organ dysfunction syndrome                         | 1 (2.9)                               | 0 (0.0)                            |
| Systemic inflammatory response syndrome                     | 1 (2.9)                               | 0 (0.0)                            |
| <b>Injury, poisoning and procedural complications</b>       | <b>1 (2.9)</b>                        | <b>0 (0.0)</b>                     |
| Postoperative ileus                                         | 1 (2.9)                               | 0 (0.0)                            |
| <b>Investigations</b>                                       | <b>1 (2.9)</b>                        | <b>0 (0.0)</b>                     |
| Neutrophil count decreased                                  | 1 (2.9)                               | 0 (0.0)                            |
| White blood cell count decreased                            | 1 (2.9)                               | 0 (0.0)                            |
| <b>Nervous system disorders</b>                             | <b>1 (2.9)</b>                        | <b>0 (0.0)</b>                     |
| Depressed level of consciousness                            | 1 (2.9)                               | 0 (0.0)                            |
| <b>Psychiatric disorders</b>                                | <b>1 (2.9)</b>                        | <b>0 (0.0)</b>                     |
| Delirium                                                    | 1 (2.9)                               | 0 (0.0)                            |
| <b>Vascular disorders</b>                                   | <b>1 (2.9)</b>                        | <b>0 (0.0)</b>                     |
| Deep vein thrombosis                                        | 1 (2.9)                               | 0 (0.0)                            |
